# Supplementary material for: Influence of Sn-substitution on the thermoelectric properties of the clathrate type-I, Ba8ZnxGe46−x−ySny
Source: Royal Society of Chemistry journal article supplement (doi:10.1039/c2dt32049e), 2012-11-30
Supplement: c2dt32049e.pdf [file c2dt32049e.pdf]

### Supplementary information:

For X-ray powder diffraction a Huber imaging plate system equipped with a monochromator (CuK<sub>α1</sub>-radiation) was used. Detailed evaluation of the powder patterns was performed via Rietveld refinements employing the FullProf program [Roisnel T, Rodriguez-Carvajal, J. Mater Sci Forum (2001) 118, pp. 378-381].

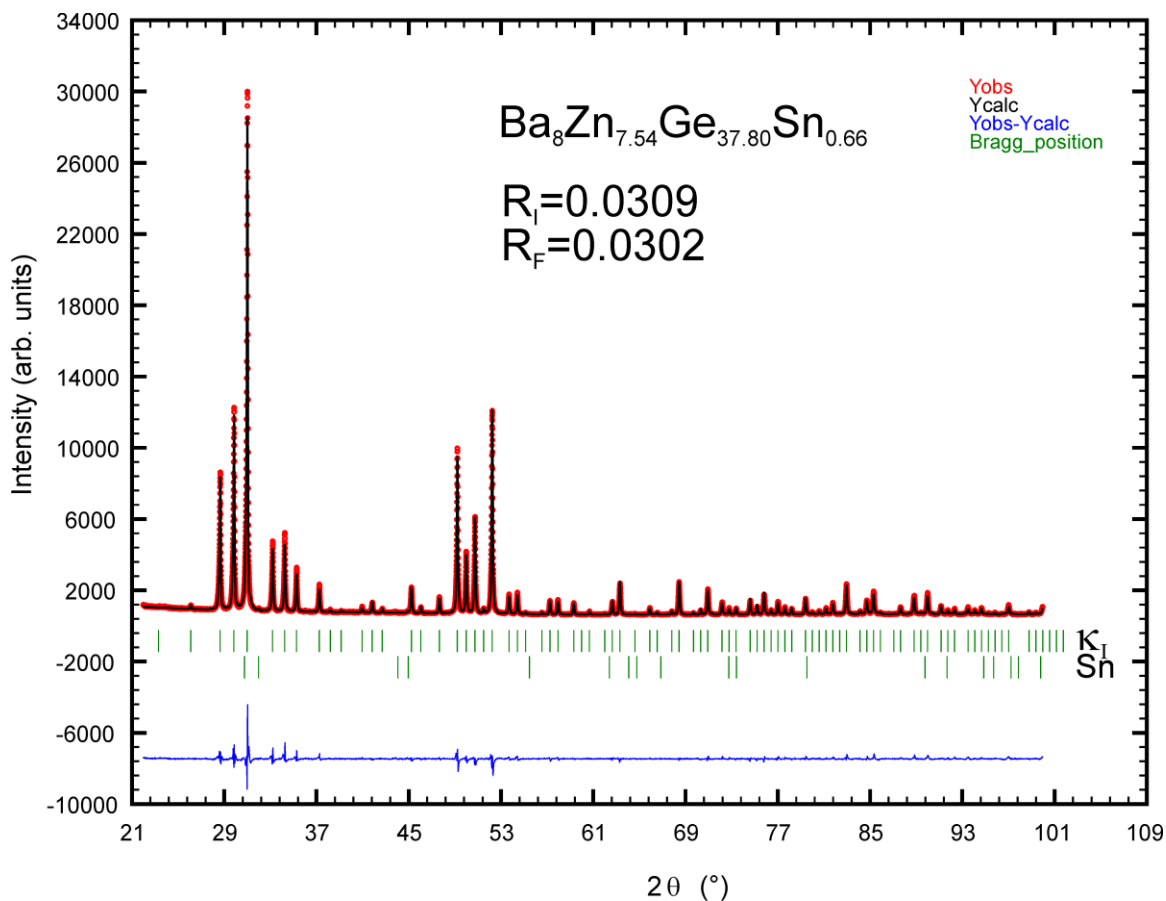

Fig. S1: Rietveld refinement of the sample  $\text{Ba}_8\text{Zn}_{7.54}\text{Ge}_{37.80}\text{Sn}_{0.66}$ . A minor content of less than 1 weight% Sn is detected.

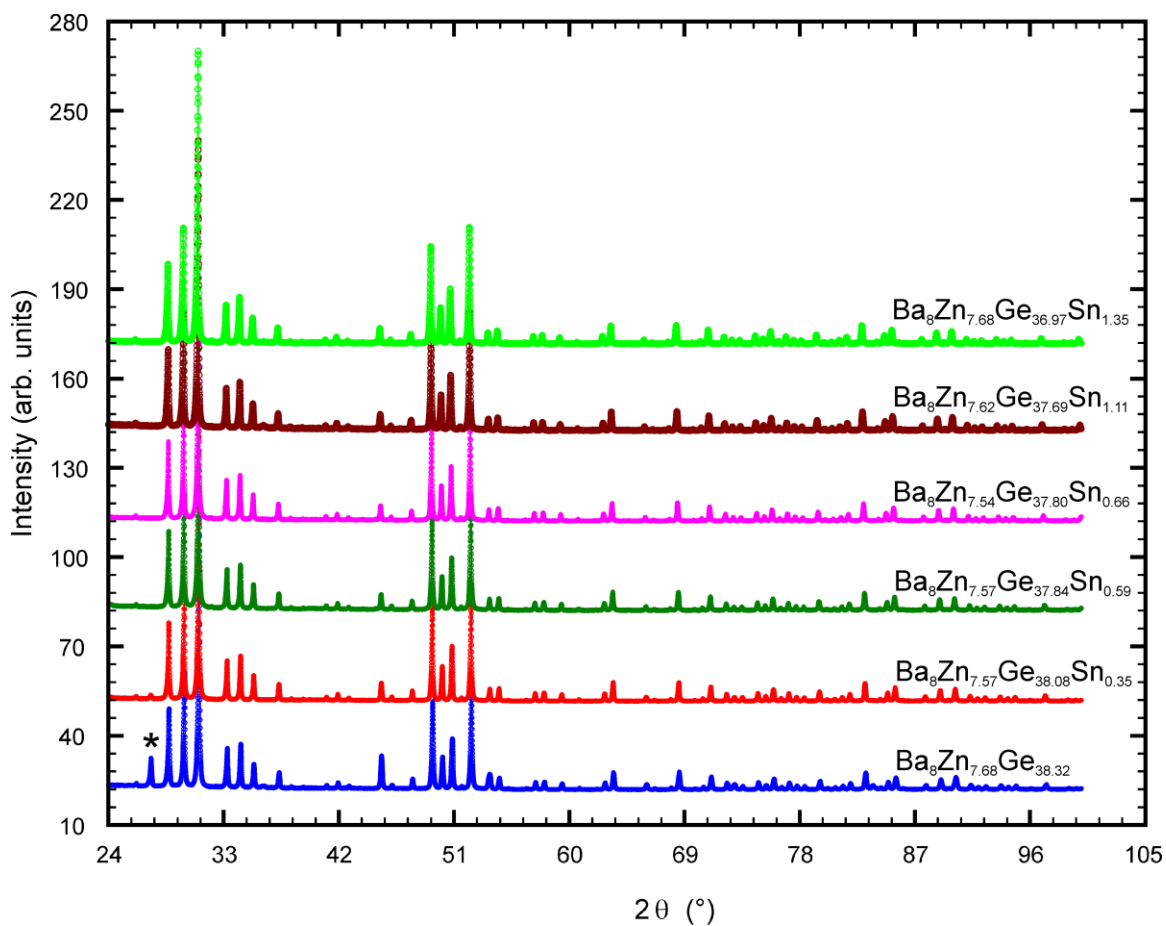

Fig. S2: X-ray powder diffraction patterns of all samples of series 1 (see Table I in the publication). The asterisk marks the (111)-reflection of Ge.

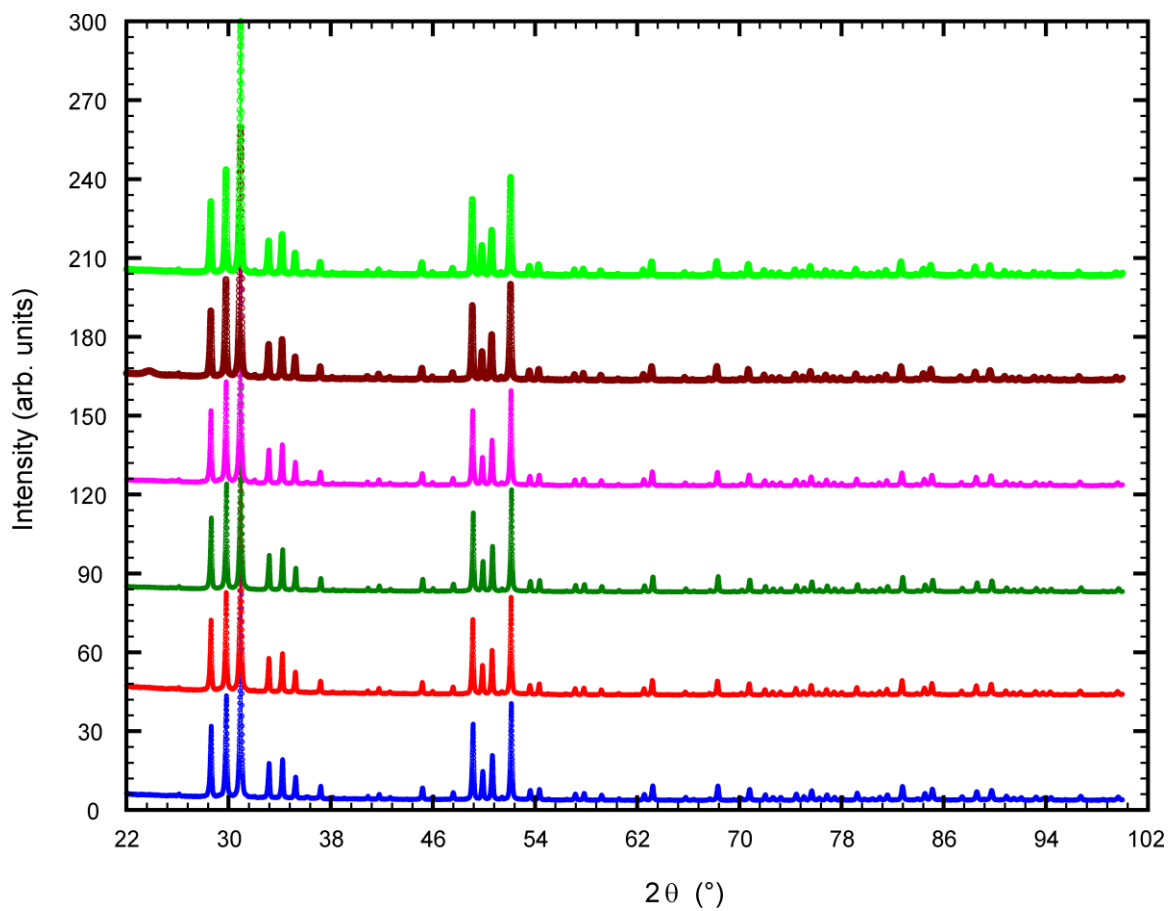

Fig. S3: X-ray powder diffraction patterns of all samples of series 2 (see Table I in the publication).
